# Supplementary material
Source: PubMed Central journal article supplement (PMC8552150)
Supplement: ejhpharm-2019-001973supp001.pdf [file ejhpharm-2019-001973supp001.pdf]

**Questionnaire Clinical Pharmacists in Germany (translation from German)**

- 1) Do you occupy clinical pharmacists in your hospital pharmacy?
  - a) Yes
  - b) No
  - c) Introduction planned

If answer a), questionnaire continues with question 2 (clinical services).

If answer b) or c), questionnaire continues with question 22 (hospital and pharmacy characteristics).

**Clinical services**

- 2) How many clinical pharmacists work in your hospital?
  - a) Number of clinical pharmacists:
  - b) Number of clinical pharmacists full time equivalent (FTE):
- 3) Do clinical pharmacists provide clinical services to external hospitals?  
(In Germany, some hospital pharmacies provide services to multiple hospitals)
  - a) Yes
  - b) No
- 4) How are the clinical pharmacists employed? (multiple answers allowed)
  - a) The clinical pharmacists are employed in the pharmacy.
  - b) The clinical pharmacists are not employed in the pharmacy, but:
  - c) The clinical pharmacists are employed exclusively for clinical pharmaceutical tasks.
  - d) The clinical pharmacists are also deployed in other parts of pharmacy (e.g. on-call duties), namely:
- 5) How do you finance clinical pharmacists? (multiple answers allowed)
  - a) Pharmacy budget
  - b) Centrally from board of directors
  - c) Clinical departments
  - d) Others
- 6) Which clinical pharmacy services do you offer? (multiple answers allowed)
  - a) Medication reconciliation on admission
  - b) Participating in ward rounds
  - c) Medication review
  - d) Pharmaceutical consultation
  - e) Patient counselling
  - f) Providing a unit-dose service
  - g) Training of doctors and nurses
  - h) Advising doctors and nurses
  - i) Preparing local therapy guidelines
  - j) Participating in working groups of the hospital
  - k) Antibiotic stewardship
  - l) Advising on pharmacoeconomic issues
  - m) Pharmaceutical discharge planning

- 7) Which clinical specialties and how many beds per clinical specialty are served by clinical pharmacists? How often and how long is the clinical pharmacist on the ward (daily Monday to Friday, weekly or less than weekly)? (multiple answers allowed)
- a) Ophthalmology
  - b) General Surgery
  - c) Obstetrics
  - d) Care of the Elderly
  - e) Gynaecology
  - f) Ear, Nose and Throat
  - g) General Medicine
  - h) Anaesthesia/Critical Care
  - i) Neurology
  - j) Haematology/Oncology
  - k) Orthopaedic Surgery
  - l) Paediatrics
  - m) Palliative Care
  - n) Psychiatry
  - o) Radiotherapy
  - p) Urology
  - q) Others:
- 8) Is there a substitute for the clinical pharmacist for annual leave/sickness?
- a) YES (Provision of details optional)
  - b) No
- 9) Is there a computerized physician order entry (CPOE) system or clinical decision support system (CDSS)? If so, which?
- a) Yes
  - b) No
  - c) Introduction planned
- 10) Do you employ other pharmaceutical professions for clinical pharmaceutical work? (multiple answers allowed)
- a) Pre-registration pharmacists
  - b) Pharmacy technicians (German PTA)
- 11) Optional comments on above questions

#### Quality assurance

- 12) Do you have standard operating procedures (SOPs) for clinical pharmacists?
- a) Yes
  - b) No
- 13) Do you have job descriptions for clinical pharmacists?
- a) Yes
  - b) No
- 14) Do you have for quality assurance purposes: (multiple answers allowed)
- a) Accompanied ward visits
  - b) Audits (internal and external)
  - c) Regular case presentations and discussion (at least monthly)

- d) Training opportunities for clinical pharmacists (internal/external)
  - e) Other:
- 15) Which qualifications do your clinical pharmacists have? (multiple answers allowed, at least 1 pharmacist per hospital with this qualification)
- a) Experience as clinical pharmacist in Germany for at least 2 years
  - b) Experience as clinical pharmacist abroad for at least 1 year
  - c) Qualification in clinical pharmacy services (German post-graduate qualification) or medicines information
  - d) Diploma of clinical pharmacy, Master of Science or PhD or comparable qualification abroad
  - e) Master of Science in clinical pharmacy or comparable qualification in Germany
  - f) Qualification in Antibiotic stewardship or infectious diseases
- 16) Do you record your pharmaceutical interventions in the medical notes?
- a) Yes
  - b) No
- 17) Do you record and evaluate pharmaceutical interventions other than in the medical notes?
- a) Yes
  - b) No
- 18) If applicable, please indicate which program you use for recording of pharmaceutical interventions:
- a) APS-Doc
  - b) APOSTAT
  - c) DokuPIK
  - d) Microsoft Excel
  - e) Other:
- 19) Optional comments on above questions
- 20) Is there an exchange of opinion with other clinical pharmacists from other hospitals?
- a) Yes. Please provide details:
  - b) No
- 21) Are you interested in an exchange? If so, in what way?

#### Hospital and pharmacy characteristics

- 22) Which type of hospital do you work in?
- a) General hospital
  - b) Maximum care hospital
  - c) University hospital
  - d) Other, please specify:
- 23) How many beds does your hospital have?
- a) <400
  - b) 400-800
  - c) >800
- 24) How many pharmacist FTE are employed in your pharmacy?
- 25) What is the name of your hospital? (optional question)
- 26) May we contact you for questions?
